# Supplementary material for: Automatic deep learning-driven label-free image-guided patch clamp system
Source: PubMed Central journal article supplement (PMC7875980; doi:10.1038/s41467-021-21291-4), 2021-02-10
Supplement: 41467_2021_21291_MOESM7_ESM.pdf [file 41467_2021_21291_MOESM7_ESM.pdf]

**Title:** Supplementary Movie 1:

**Description:** Animated introduction of the DIGAP system.

**Title:** Supplementary Movie 2:

**Description:** Screen record of the DIGAP system.

**Title:** Supplementary Movie 3:

**Description:** Example patch clamping process from multiple camera angles.

**Title:** Supplementary Movie 4:

**Description:** Lateral cell tracking examples.
